# Supplementary material for: Efficient Generation of Neural Stem Cells from Embryonic Stem Cells Using a Three-Dimensional Differentiation System
Source: MDPI journal article supplement (doi:10.3390/ijms22158322), 2021-08-03
Supplement: s1 [file s1]

*Supplementary information*

**Efficient generation of neural stem cells from ES cells through three-dimensional differentiation system**

**Sang Hoon Yoon<sup>a</sup>, Mi Rae Bae<sup>a</sup>, Hyeonwoo La, Hyuk Song, Kwonho Hong, and Jeong Tae Do\***

Department of Stem Cell and Regenerative Biotechnology, Konkuk Institute of Technology, Konkuk University,  
120 Neungdong-ro, Gwangjin-gu, Seoul 05029, Korea

<sup>a</sup> These authors contributed equally to this work.

\*Correspondence should be addressed to: J.T. Do

E-mail: [dojt@konkuk.ac.kr](mailto:dojt@konkuk.ac.kr)

Tel.: 82-2-450-3673

Fax: 82-2-455-1044

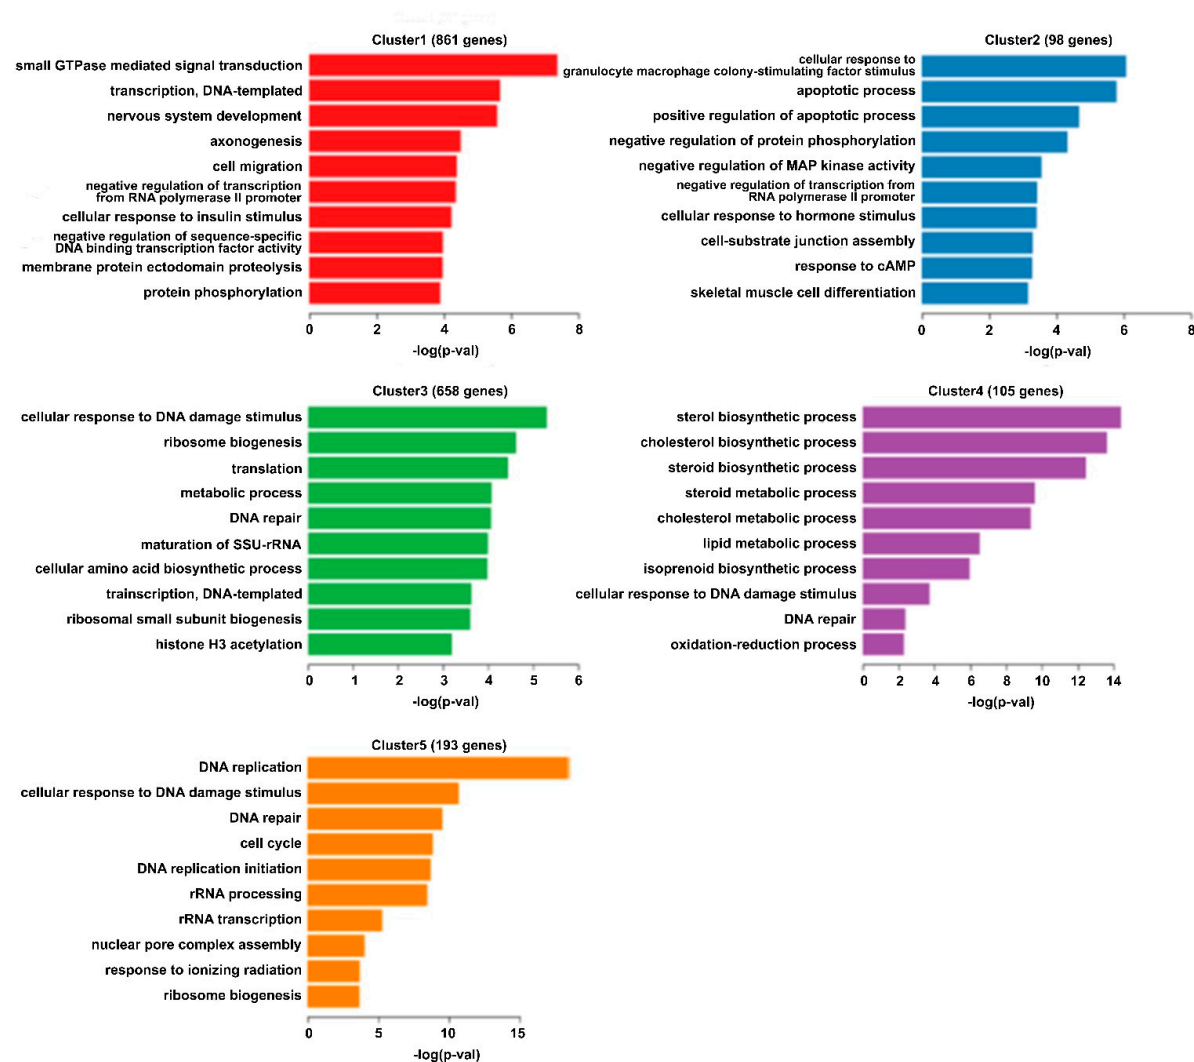

**Supplementary Figure S1. Additional Data on Transcriptome Analysis of Established NSCs at the Bulk Levels, Related to Figure 4.** DEG clusters analysis of established NSCs, brain-derive NSCs, and Sox-1 GFP ESCs. Q-value, adjusted P-value for multiple comparisons.
